# Supplementary material
Source: ML conference proceedings conference paper supplement (https://openreview.net/forum?id=kR0Tv4iEPu)
Supplement: supplementary_material [file attachment]

## A ENVIRONMENTS

### A.1 DISTRACTING DMCONTROL

We increase the visual complexity of DMControl “walker” task (Tassa et al., 2018) by overlaying randomly sampled videos from the DAVIS 2017 dataset (Pont-Tuset et al., 2017), similar to Stone et al. (2021). In our experiments we use expert policies to collect offline datasets for the pre-training tasks of standing, forward walking, and backward walking respectively. To collect these datasets, we pre-train policies with SAC (Haarnoja et al., 2018a) in the state space and collect rollouts of the visual observation. We test our representation on the downstream task of “running”.

**Rewards:** We use reward functions provided by DMControl “walker” task (Tassa et al., 2018). For the backward walking task, we invert the sign of walk speed in “forward” task defined in DMControl so that the agent gets higher reward when the agent moves backward instead of forward.

### A.2 ViZDOOM

Our experiments use “D3 battle” environment provided by Wydmuch et al. (2018) where the agent’s objective is to defend against enemies while collecting medi-packs and ammunition. For collection of the prior task dataset, we use the pre-trained models provided by Dosovitskiy and Koltun (2017) and vary the reward weighting parameters (described below) to produce a diverse set of behaviours.

**Rewards:** A reward function is defined by a linear combination of three measurements (ammunition, health, and frags) with their corresponding coefficients.

$$R_{\text{ViZDoom}} = c_{\text{ammo}} \cdot \frac{x_t^{\text{ammo}} - x_{t-1}^{\text{ammo}}}{7.5} + c_{\text{health}} \cdot \frac{x_t^{\text{health}} - x_{t-1}^{\text{health}}}{30.0} + c_{\text{frags}} \cdot \frac{x_t^{\text{frags}} - x_{t-1}^{\text{frags}}}{1.0}. \quad (5)$$

where  $x_t^{\text{ammo}}$  is a measurement of ammunition,  $x_t^{\text{health}}$  is health of the agent, and  $x_t^{\text{frags}}$  is a number of frags at timestep  $t$ . The set of coefficients for ammunition, health and frags are represented as  $(c_{\text{ammo}}, c_{\text{health}}, c_{\text{frags}})$ . We use the coefficients of  $(0, 0, 1)$ ,  $(0, 1, 0)$ , and  $(1, 1, -1)$  for the prior tasks, and  $(0.5, 0.5, 1.0)$  for the target task.

### A.3 CARLA

In our experiments, we use the map of “Town05” from the CARLA environment (Dosovitskiy et al., 2017). At the beginning of each episode, we randomly spawn 300 vehicles and 200 pedestrians. The initial location of the agent is randomly sampled from a task set containing multiple start and goal locations. We collect the datasets for the tasks of intersection crossing, taking a right turn, and taking a left turn using pre-trained policies. We pre-train the policies with SAC (Haarnoja et al., 2018a) using segmentation masks of the environment as the input, and then use the learnt policies to collect rollouts of visual observations for the datasets.

**Rewards:** We use the same reward function for all of the tasks. The reward function consists of terms for speed, centering on a road, angle of the agent, and collision.

$$\begin{aligned} R_{\text{speed}} &= \frac{v}{v_{\min}} \cdot \mathbb{1}_{v \leq v_{\min}} + \left(1.0 - \frac{v - v_{\text{target}}}{v_{\max} - v_{\text{target}}}\right) \cdot \mathbb{1}_{v \geq v_{\max}} + 1.0 \cdot \mathbb{1}_{v_{\min} \leq v \leq v_{\max}}. \\ R_{\text{centering}} &= \max\left(1.0 - \frac{d_{\text{center}}}{d_{\max}}, 0\right). \\ R_{\text{angle}} &= \max\left(1.0 - \left|\frac{r}{(r_{\max} \cdot \frac{\pi}{180})}\right|, 0\right). \\ R_{\text{CARLA}} &= R_{\text{speed}} + R_{\text{centering}} + R_{\text{angle}} - 10^{-4} \cdot \text{collision\_intensity}. \end{aligned} \quad (6)$$

where  $v$  is velocity of the agent,  $d_{\text{center}}$  is distance between the center of the road and the agent,  $r$  is angle of the agent. We use constant values of  $v_{\min} = 15.0$ ,  $v_{\max} = 30.0$ ,  $v_{\text{target}} = 25.0$ ,  $d_{\max} = 3$ , and  $r_{\max} = 20$ .

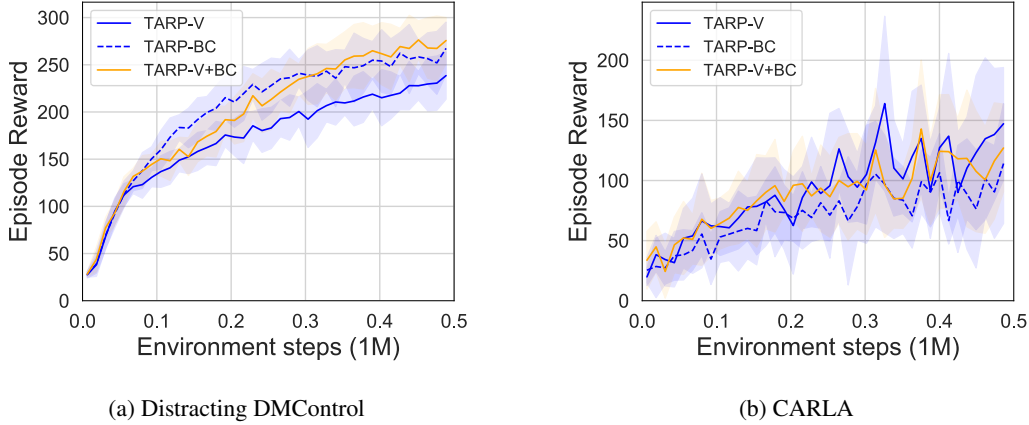

Figure 9: Transfer performance for single source and multiple source task-induced representation. Our task-induced representation with multiple supervision performs slightly better or as good as the single source representation. Thus, task-induced representation learning framework is compatible with heterogeneous datasets.

## B DATA COLLECTION FOR MULTI-SOURCE TASK SUPERVISION

We use supervision from heterogeneous data sources to learn task-induced representations. For the distracting DMControl environment, the dataset is composed of demonstrations for the “forward walking” and “backward walking” tasks, and a dataset with reward annotations for the “stand” task. For the CARLA environment, the task-induced representations are trained on a dataset composed of demonstrations for the “intersection crossing” task, and the datasets annotated with rewards for the “right turn” and “left turn” tasks. For both environments, the datasets are collected with the procedure described in Appendix A.

## C HYPERPARAMETERS

### C.1 HYPERPARAMETERS FOR RL

Table 1: Common SAC hyperparameter

| Parameter                               | Value                |
|-----------------------------------------|----------------------|
| Stacked frames                          | 3                    |
| Optimizer                               | Adam                 |
| Learning rate                           | $3e-4$               |
| Discount factor ( $\gamma$ )            | 0.99                 |
| Latent dimension                        | 256                  |
| Convolution filters                     | [8, 16, 32, 64]      |
| Convolution strides                     | [2, 2, 2, 2]         |
| Convolution filter size                 | 3                    |
| Hidden Units (MLP)                      | [1024]               |
| Nonlinearity                            | ReLU                 |
| Target smoothing coefficient ( $\tau$ ) | 0.005                |
| Target entropy                          | $-\dim(\mathcal{A})$ |

Table 2: Distracting DMControl SAC hyperparameter

| Parameter              | Value           |
|------------------------|-----------------|
| Observation Rendering  | (64, 64), RGB   |
| Initial steps          | $5 \times 10^3$ |
| Action repeat          | 2               |
| Replay buffer size     | $10^5$          |
| Minibatch size         | 256             |
| Target update interval | 1               |
| Actor update interval  | 1               |
| Initial temperature    | 1               |

Table 3: CARLA SAC hyperparameter

| Parameter              | Value           |
|------------------------|-----------------|
| Observation Rendering  | (128, 128), RGB |
| Initial steps          | $3 \times 10^3$ |
| Action repeat          | 1               |
| Replay buffer size     | $10^5$          |
| Minibatch size         | 128             |
| Target update interval | 2               |
| Actor update interval  | 2               |
| Initial temperature    | 0.1             |

Table 4: ViZDoom PPO hyperparameter

| Parameter                                  | Value           |
|--------------------------------------------|-----------------|
| Observation rendering                      | (64, 64) Grey   |
| Stacked frames                             | 4               |
| Action repeat                              | 1               |
| Optimizer                                  | Adam            |
| Learning rate                              | $3e-4$          |
| PPO epoch                                  | 10              |
| Buffer size                                | 2048            |
| Convolution filters                        | [8, 16, 32, 64] |
| Convolution filter sizes                   | [2, 2, 2, 2]    |
| Hidden units (MLP)                         | [256]           |
| Generalized advantage estimation $\lambda$ | 0.95            |
| Entropy bonus coefficient                  | $4e-3$          |
| Discount factor ( $\gamma$ )               | 0.99            |
| Minibatch size                             | 256             |
| Nonlinearity                               | ReLU            |

Table 5: Hyperparameters for CQL

| Environment           | Trade-off factor $\alpha$ for Q-values | Number of action samples |
|-----------------------|----------------------------------------|--------------------------|
| Distracting DMControl | 3.                                     | 1                        |
| ViZDoom               | 1.                                     | 1                        |
| CARLA                 | 3.                                     | 1                        |

## C.2 HYPERPARAMETERS FOR PRE-TRAINING

In TARP-BC, we use recurrent neural networks to predict a sequence of actions over prediction horizon  $T$  to learn task-induced representations only in CARLA (see Table 7).

Table 6: Common model parameters

| Parameter          | Value |
|--------------------|-------|
| Batch size         | 128   |
| Hidden units (MLP) | [256] |
| Learning rate      | 1e-4  |

Table 7: Hyperparameters for TARP-BC

| Environment           | LSTM hidden units | Prediction horizon |
|-----------------------|-------------------|--------------------|
| Distracting DMControl | —                 | -                  |
| ViZDoom               | —                 | -                  |
| CARLA                 | 512               | 8                  |

Table 8: Hyperparameters for TARP-V

| Environment      | Discount rate |
|------------------|---------------|
| All environments | 0.4           |

Table 9: Hyperparameters for TARP-Bisim

| Environment           | Reward predictive loss weight | Bisimulation loss weight $T$ |
|-----------------------|-------------------------------|------------------------------|
| Distracting DMControl | 1.                            | 0.1                          |
| ViZDoom               | 1.                            | 10.                          |
| CARLA                 | 1.                            | 0.01                         |

Table 10: Hyperparameters for VAE

| Environment           | $\beta$ constraint |
|-----------------------|--------------------|
| Distracting DMControl | 100.               |
| ViZDoom               | 100.               |
| CARLA                 | 10.                |

Table 11: Hyperparameters for Pred-S and Pred-R+S

| Environment           | $\beta$ constraint | Prediction horizon $T$ |
|-----------------------|--------------------|------------------------|
| Distracting DMControl | 50.                | 6                      |
| ViZDoom               | 10.                | 6                      |
| CARLA                 | 5.                 | 8                      |

Table 12: Hyperparameters for ATC

| Environment      | Random shift probability | Temporal shift |
|------------------|--------------------------|----------------|
| All environments | 1.                       | 3              |
